# Supplementary material for: Genistein Induces Deleterious Effects during Its Acute Exposure in Swiss Mice
Source: Hindawi journal article supplement (doi:10.1155/2014/619617), 2014-01-01
Supplement: f1 [file 619617.f1.pdf]

**Table S1.** List of differentially expressed genes under selected functional categories

| Probe name                                                                     | Gene symbol | Name                                                           | Fold geomean |           |          |
|--------------------------------------------------------------------------------|-------------|----------------------------------------------------------------|--------------|-----------|----------|
|                                                                                |             |                                                                | Group II     | Group III | Group IV |
| <b>Expression of oxidative stress and glutathione metabolism related genes</b> |             |                                                                |              |           |          |
| GT_Mm_44k_51_P100<br>828                                                       | Prdx3       | Peroxiredoxin 3                                                | -0.497       | -0.269    | -0.984   |
| GT_Mm_44k_51_P106<br>397                                                       | Prkd3       | Protein kinase D3                                              | -0.548       | -0.685    | -0.619   |
| GT_Mm_44k_51_P353<br>183                                                       | Prdx1       | Peroxiredoxin 1                                                | -1.641       | -0.405    | -2.390   |
| GT_Mm_44k_51_P386<br>880                                                       | Stip1       | Stress-induced phosphoprotein 1                                | -0.640       | -0.678    | -0.533   |
| GT_Mm_44k_51_P411<br>271                                                       | Nfe2l2      | Nuclear factor, erythroid derived 2, like 2                    | -1.393       | -0.607    | -2.060   |
| GT_Mm_44k_51_P437<br>336                                                       | Uaca        | Uveal autoantigen with coiled-coil domains and ankyrin repeats | 0.587        | 0.506     | 1.418    |
| GT_Mm_44k_51_P483<br>280                                                       | Prnp        | Prion protein                                                  | -0.740       | -0.373    | -1.998   |
| GT_Mm_44k_52_P376<br>804                                                       | Hspa13      | Heat shock protein 70 family, member 13                        | -1.796       | -0.771    | -1.582   |
| GT_Mm_44k_52_P423<br>424                                                       | Ero1l       | ERO1-like (S. cerevisiae)                                      | -1.045       | -0.432    | -0.770   |
| GT_Mm_44k_51_P231<br>184                                                       | Anpep       | Alanyl (membrane) aminopeptidase                               | 0.148        | -0.387    | -0.377   |
| GT_Mm_44k_51_P260<br>169                                                       | Gstm5       | Glutathione S-transferase, mu 5                                | -1.155       | -0.307    | -1.100   |
| GT_Mm_44k_51_P287<br>810                                                       | Mgst1       | Microsomal glutathione S-transferase 1                         | -1.133       | -0.987    | -1.582   |
| GT_Mm_44k_51_P289<br>881                                                       | Txndc12     | Thioredoxin domain containing 12                               | -0.436       | -0.632    | -0.845   |
| GT_Mm_44k_51_P374<br>464                                                       | Gstp1       | Glutathione S-transferase, pi 1                                | -1.513       | -1.170    | -1.670   |
| GT_Mm_44k_52_P358<br>860                                                       | Gss         | Glutathione synthetase                                         | -0.856       | -0.461    | -1.391   |
| GT_Mm_44k_52_P379<br>256                                                       | Lap3        | Leucine aminopeptidase 3                                       | -1.002       | -0.697    | -0.967   |
| GT_Mm_44k_52_P415<br>215                                                       | Gstm1       | Glutathione S-transferase, mu 1                                | -1.286       | -0.868    | -1.666   |
| GT_Mm_44k_52_P432<br>124                                                       | Gsta3       | Glutathione S-transferase, alpha 3                             | 0.329        | -0.406    | -1.382   |
| GT_Mm_44k_52_P641<br>758                                                       | Ggct        | Gamma-glutamyl cyclotransferase                                | -0.516       | 0.848     | 0.657    |
| <b>Expression of defense and MAPK related genes</b>                            |             |                                                                |              |           |          |

|                      |          |                                                              |        |        |        |
|----------------------|----------|--------------------------------------------------------------|--------|--------|--------|
| GT_Mm_44k_00046      | Defa-rs4 | Defensin, alpha,, related sequence 4                         | 1.262  | 1.845  | 1.173  |
| GT_Mm_44k_01450      | Mgmt     | O-6-methylguanine-DNA methyltransferase                      | 0.506  | -0.826 | -0.425 |
| GT_Mm_44k_01532      | Cd74     | CD74 antigen                                                 | -1.725 | 0.747  | 0.604  |
| GT_Mm_44k_02048      | Ifna6    | Interferon alpha 6                                           | 0.453  | 1.391  | 1.272  |
| GT_Mm_44k_51_P117881 | Leap2    | Liver-expressed antimicrobial peptide 2                      | -0.137 | -0.576 | -0.662 |
| GT_Mm_44k_51_P129012 | B2m      | Beta-2 microglobulin                                         | -1.170 | 0.227  | -1.353 |
| GT_Mm_44k_51_P209527 | Bcl10    | B-cell leukemia/lymphoma 10                                  | -1.547 | -0.235 | -2.186 |
| GT_Mm_44k_51_P217218 | Il6      | Interleukin 6                                                | -0.230 | -0.231 | 0.501  |
| GT_Mm_44k_51_P302576 | Spn      | Sialophorin                                                  | -      | -      | -9.855 |
| GT_Mm_44k_51_P373619 | Mbl1     | Mannose-binding lectin (protein A) 1                         | -1.542 | -0.727 | -1.305 |
| GT_Mm_44k_51_P385993 | Rela     | V-rel reticuloendotheliosis viral oncogene homolog A (avian) | -0.883 | -0.532 | -0.759 |
| GT_Mm_44k_51_P402846 | Stab2    | Stabilin 2                                                   | -0.365 | -0.682 | -0.234 |
| GT_Mm_44k_51_P405476 | Fcer1g   | Fc receptor, IgE, high affinity I, gamma polypeptide         | -1.022 | -0.077 | -0.661 |
| GT_Mm_44k_51_P432563 | Tlr9     | Toll-like receptor 9                                         | -0.228 | -0.486 | -0.905 |
| GT_Mm_44k_51_P454008 | Lbp      | Lipopolysaccharide binding protein                           | -1.750 | 0.227  | -1.356 |
| GT_Mm_44k_51_P500676 | Dmbt1    | Deleted in malignant brain tumors 1                          | -1.697 | -3.165 | -2.026 |
| GT_Mm_44k_51_P506733 | P2rx7    | Purinergic receptor P2X, ligand-gated ion channel, 7         | 0.359  | 0.533  | 1.150  |
| GT_Mm_44k_52_P21486  | Hamp2    | Hepcidin antimicrobial peptide 2                             | 5.089  | 3.513  | 2.057  |
| GT_Mm_44k_52_P321140 | Defb1    | Defensin beta 1                                              | 0.548  | -1.418 | -1.300 |
| GT_Mm_44k_52_P435356 | Cotl1    | Coactosin-like 1 (Dictyostelium)                             | -0.798 | -0.476 | -0.434 |
| GT_Mm_44k_52_P578732 | Ccr5     | Chemokine (C-C motif) receptor 5                             | 0.502  | 0.670  | 1.258  |
| GT_Mm_44k_52_P582059 | Lyz1     | Lysozyme 1                                                   | -1.130 | 0.413  | -1.403 |

|                          |              |                                                              |        |        |        |
|--------------------------|--------------|--------------------------------------------------------------|--------|--------|--------|
| GT_Mm_44k_52_P590<br>625 | Nlrp10       | NLR family, pyrin domain containing 10                       | 0.467  | 2.532  | 1.162  |
| GT_Mm_44k_52_P621<br>991 | Apaf1        | Apoptotic peptidase activating factor 1                      | 0.476  | 1.530  | 1.234  |
| GT_Mm_44k_52_P669<br>922 | Hamp         | Hepcidin antimicrobial peptide                               | 2.966  | 3.175  | -2.870 |
| GT_Mm_44k_01225          | Ppm1b        | Protein phosphatase 1B, magnesium dependent, beta isoform    | 0.504  | 0.240  | 0.632  |
| GT_Mm_44k_01846          | Arrb2        | Arrestin, beta 2                                             | 0.474  | -0.162 | 0.644  |
| GT_Mm_44k_51_P104<br>418 | Dusp10       | Dual specificity phosphatase 10                              | 0.533  | 0.350  | -0.256 |
| GT_Mm_44k_51_P117<br>952 | Hspa1a       | Heat shock protein 1A                                        | -3.974 | -4.569 | -3.734 |
| GT_Mm_44k_51_P170<br>371 | Hspa8        | Heat shock protein 8                                         | -1.398 | -0.302 | -1.022 |
| GT_Mm_44k_51_P170<br>807 | Map3k6       | Mitogen-activated protein kinase kinase kinase 6             | -0.099 | 1.708  | 1.501  |
| GT_Mm_44k_51_P184<br>385 | Pla2g12<br>b | Phospholipase A2, group XIIB                                 | -0.732 | -0.246 | -0.446 |
| GT_Mm_44k_51_P274<br>223 | Fgf17        | Fibroblast growth factor 17                                  | 0.345  | 1.167  | 1.784  |
| GT_Mm_44k_51_P305<br>003 | Ntrk1        | Neurotrophic tyrosine kinase, receptor, type 1               | 0.507  | 2.811  | 1.170  |
| GT_Mm_44k_51_P315<br>904 | Gadd45<br>g  | Growth arrest and DNA-damage-inducible 45 gamma              | -0.065 | 1.572  | 2.718  |
| GT_Mm_44k_51_P318<br>488 | Akt3         | Thymoma viral proto-oncogene 3                               | 0.358  | -0.165 | 1.145  |
| GT_Mm_44k_51_P345<br>393 | Fas          | Fas (TNF receptor superfamily member 6)                      | -1.263 | -0.337 | -1.117 |
| GT_Mm_44k_51_P357<br>744 | Jund         | Jun proto-oncogene related gene d                            | 0.347  | 0.086  | 1.160  |
| GT_Mm_44k_51_P370<br>090 | Pdgfa        | Platelet derived growth factor, alpha                        | -0.074 | -0.184 | -0.172 |
| GT_Mm_44k_51_P385<br>993 | Rela         | V-rel reticuloendotheliosis viral oncogene homolog A (avian) | -0.883 | -0.532 | -0.759 |
| GT_Mm_44k_51_P396<br>273 | Nras         | Neuroblastoma ras oncogene                                   | 0.531  | 3.918  | 1.947  |
| GT_Mm_44k_51_P461<br>748 | Dusp3        | Dual specificity phosphatase 3                               | 0.675  | 0.205  | 1.080  |
| GT_Mm_44k_51_P513        | Rac1         | RAS-related C3                                               | -1.950 | -0.878 | -1.787 |

|                                                       |         |                                                              |        |        |        |
|-------------------------------------------------------|---------|--------------------------------------------------------------|--------|--------|--------|
| 254                                                   |         | botulinum substrate 1                                        |        |        |        |
| GT_Mm_44k_52_P106                                     | Egfr    | Epidermal growth factor receptor                             | -0.143 | -0.338 | 0.178  |
| 259                                                   |         |                                                              |        |        |        |
| GT_Mm_44k_52_P166                                     | Taok3   | TAO kinase 3                                                 | 0.652  | -0.186 | 0.944  |
| 755                                                   |         |                                                              |        |        |        |
| GT_Mm_44k_52_P168                                     | Fgf14   | Fibroblast growth factor 14                                  | 0.528  | 0.449  | 1.492  |
| 549                                                   |         |                                                              |        |        |        |
| GT_Mm_44k_52_P209                                     | Cacnb2  | Calcium channel, voltage-dependent, beta 2 subunit           | 0.498  | 2.137  | 1.171  |
| 514                                                   |         |                                                              |        |        |        |
| GT_Mm_44k_52_P235                                     | Fgf21   | Fibroblast growth factor 21                                  | -0.719 | 0.440  | -0.624 |
| 347                                                   |         |                                                              |        |        |        |
| GT_Mm_44k_52_P251                                     | Tgfbr2  | Transforming growth factor, beta receptor II                 | 0.513  | 1.025  | 1.321  |
| 403                                                   |         |                                                              |        |        |        |
| GT_Mm_44k_52_P267                                     | Fgf13   | Fibroblast growth factor 13                                  | 1.338  | 0.488  | 1.789  |
| 243                                                   |         |                                                              |        |        |        |
| GT_Mm_44k_52_P297                                     | Akt2    | Thymoma viral proto-oncogene 2                               | -1.394 | -0.974 | -1.834 |
| 7                                                     |         |                                                              |        |        |        |
| GT_Mm_44k_52_P399                                     | Dusp2   | Dual specificity phosphatase 2                               | -0.637 | 0.317  | -0.885 |
| 934                                                   |         |                                                              |        |        |        |
| GT_Mm_44k_52_P404                                     | Hspb1   | Heat shock protein 1                                         | -1.509 | -1.775 | -1.141 |
| 533                                                   |         |                                                              |        |        |        |
| GT_Mm_44k_52_P423                                     | Mos     | Moloney sarcoma oncogene                                     | 0.391  | 1.301  | 1.225  |
| 32                                                    |         |                                                              |        |        |        |
| GT_Mm_44k_52_P611                                     | Cacna1g | Calcium channel, voltage-dependent, T type, alpha 1G subunit | 0.353  | 1.725  | 1.148  |
| 610                                                   |         |                                                              |        |        |        |
| GT_Mm_44k_52_P648                                     | Dusp9   | Dual specificity phosphatase 9                               | 0.417  | -0.151 | 2.419  |
| 601                                                   |         |                                                              |        |        |        |
| GT_Mm_44k_52_P771                                     | Fasl    | Fas ligand (TNF superfamily, member 6)                       | 0.416  | 0.785  | 1.211  |
| 06                                                    |         |                                                              |        |        |        |
| <b>Expression of ETS and glycolysis related genes</b> |         |                                                              |        |        |        |
| GT_Mm_44k_00911                                       | Cyp2d1  | Cytochrome P450, family 2, subfamily d, polypeptide 22       | -0.660 | -1.147 | -1.279 |
|                                                       | 0,1,2   |                                                              |        |        |        |
| GT_Mm_44k_01406                                       | Cyp4a1  | Cytochrome P450, family 4, subfamily a, polypeptide 14       | 4.307  | 2.209  | 4.419  |
|                                                       | 4       |                                                              |        |        |        |
| GT_Mm_44k_01473                                       | Frrs1   | Ferric-chelate reductase 1                                   | 0.793  | 0.303  | 1.262  |
| GT_Mm_44k_01762                                       | Ndufs7  | NADH dehydrogenase (ubiquinone) Fe-S protein 7               | 0.385  | -0.418 | 0.333  |
| GT_Mm_44k_01942                                       | Aifm3   | Apoptosis-inducing factor, mitochondrion-associated 3        | 0.601  | -0.809 | -0.637 |
| GT_Mm_44k_51_P100                                     | Atp5j   | ATP synthase, H+                                             | -1.356 | -0.125 | -1.061 |

|                          |                        |                                                                                                       |        |        |        |
|--------------------------|------------------------|-------------------------------------------------------------------------------------------------------|--------|--------|--------|
| 866                      |                        | transporting,<br>mitochondrial F0<br>complex, subunit F                                               |        |        |        |
| GT_Mm_44k_51_P120<br>295 | Cyp2d2<br>6            | Cytochrome P450,<br>family 2, subfamily d,<br>polypeptide 26                                          | 0.234  | -0.419 | 0.446  |
| GT_Mm_44k_51_P124<br>126 | Cyp2d1<br>0<br>,11,d22 | Cytochrome P450,<br>family 2, subfamily d,<br>polypeptide 22                                          | 0.429  | -0.409 | 0.300  |
| GT_Mm_44k_51_P131<br>800 | Cyba                   | Cytochrome b-245, alpha<br>polypeptide                                                                | -1.616 | -0.678 | -1.112 |
| GT_Mm_44k_51_P134<br>142 | Cyp2c7<br>0            | Cytochrome P450,<br>family 2, subfamily c,<br>polypeptide 70                                          | -0.542 | -1.009 | -0.435 |
| GT_Mm_44k_51_P138<br>152 | Cisd1                  | CDGSH iron sulfur<br>domain 1                                                                         | 0.466  | -0.295 | -0.828 |
| GT_Mm_44k_51_P141<br>123 | Cox5b                  | Cytochrome c oxidase,<br>subunit Vb                                                                   | 0.324  | -0.206 | 0.284  |
| GT_Mm_44k_51_P160<br>744 | Ndufb3                 | NADH dehydrogenase<br>(ubiquinone) 1 beta<br>subcomplex 3                                             | 0.384  | -0.183 | -0.430 |
| GT_Mm_44k_51_P168<br>708 | Atp5f1                 | ATP synthase, H+<br>transporting,<br>mitochondrial F0<br>complex, subunit b,<br>isoform 1             | 0.282  | -0.469 | -0.926 |
| GT_Mm_44k_51_P177<br>552 | Ndufb9                 | NADH dehydrogenase<br>(ubiquinone) 1 beta<br>subcomplex, 9                                            | 0.398  | -0.330 | 0.413  |
| GT_Mm_44k_51_P183<br>292 | Atp5g1                 | ATP synthase, H+<br>transporting,<br>mitochondrial F0<br>complex, subunit c<br>(subunit 9), isoform 1 | -0.520 | -0.421 | -0.767 |
| GT_Mm_44k_51_P184<br>284 | Dld                    | Dihydrolipoamide<br>dehydrogenase                                                                     | -0.731 | -0.804 | -2.104 |
| GT_Mm_44k_51_P263<br>756 | Ndufa7                 | NADH dehydrogenase<br>(ubiquinone) 1 alpha<br>subcomplex, 7 (B14.5a)                                  | -0.166 | 0.061  | -0.605 |
| GT_Mm_44k_51_P291<br>129 | Fdx1                   | Ferredoxin 1                                                                                          | 0.359  | -0.700 | -0.994 |
| GT_Mm_44k_51_P295<br>610 | Cyc1                   | Cytochrome c-1                                                                                        | -0.857 | -0.529 | -1.025 |
| GT_Mm_44k_51_P301<br>289 | Atp5k                  | ATP synthase, H+<br>transporting,<br>mitochondrial F1F0                                               | 0.600  | -0.399 | 0.219  |

|                          |                  |                                                                             |        |        |        |
|--------------------------|------------------|-----------------------------------------------------------------------------|--------|--------|--------|
|                          |                  | complex, subunit e                                                          |        |        |        |
| GT_Mm_44k_51_P311<br>434 | Cyb5             | Cytochrome b-5                                                              | -0.509 | -0.162 | -1.565 |
| GT_Mm_44k_51_P324<br>871 | Cybasc3          | Cytochrome b, ascorbate<br>dependent 3                                      | -0.275 | -0.587 | -0.731 |
| GT_Mm_44k_51_P336<br>827 | Cyb5b            | Cytochrome b5 type B                                                        | -0.910 | -0.484 | -1.036 |
| GT_Mm_44k_51_P338<br>728 | Sdhaf1           | Succinate dehydrogenase<br>complex assembly factor<br>1                     | -0.153 | -0.524 | -0.248 |
| GT_Mm_44k_51_P365<br>521 | Atp5o            | ATP synthase, H+<br>transporting,<br>mitochondrial F1<br>complex, O subunit | 0.106  | -0.084 | -0.097 |
| GT_Mm_44k_51_P410<br>823 | Sdha             | Succinate dehydrogenase<br>complex, subunit A,<br>flavoprotein (Fp)         | -0.639 | -0.851 | -2.143 |
| GT_Mm_44k_51_P472<br>671 | Uqcrb            | Ubiquinol-cytochrome c<br>reductase binding protein                         | 0.297  | -0.117 | -0.586 |
| GT_Mm_44k_51_P478<br>303 | Cyp2d9,<br>12    | Cytochrome P450,<br>family 2, subfamily d,<br>polypeptide 9                 | -0.606 | -0.947 | -0.807 |
| GT_Mm_44k_51_P482<br>051 | Cyp3a4<br>1b, 16 | Cytochrome P450,<br>family 3, subfamily a,<br>polypeptide 16                | -0.488 | -0.452 | -0.942 |
| GT_Mm_44k_51_P489<br>367 | Cyp3a2<br>5      | Cytochrome P450,<br>family 3, subfamily a,<br>polypeptide 25                | -0.986 | -1.262 | -2.248 |
| GT_Mm_44k_52_P136<br>153 | Cox7c            | Cytochrome c oxidase,<br>subunit VIIc                                       | 0.123  | -0.786 | -0.804 |
| GT_Mm_44k_52_P170<br>054 | Ndufv3           | NADH dehydrogenase<br>(ubiquinone) flavoprotein<br>3                        | -0.633 | -0.489 | -0.731 |
| GT_Mm_44k_52_P217<br>474 | Ndufa6           | NADH dehydrogenase<br>(ubiquinone) 1 alpha<br>subcomplex, 6 (B14)           | -0.470 | -0.513 | -1.425 |
| GT_Mm_44k_52_P380<br>314 | Cyp3a2<br>5      | Cytochrome P450,<br>family 3, subfamily a,<br>polypeptide 25                | -0.540 | -1.036 | -1.462 |
| GT_Mm_44k_52_P423<br>424 | Ero1l            | ERO1-like ( <i>S. cerevisiae</i> )                                          | -1.045 | -0.432 | -0.770 |
| GT_Mm_44k_52_P444<br>628 | Cybb             | Cytochrome b-245, beta<br>polypeptide                                       | -2.624 | 0.021  | -0.841 |
| GT_Mm_44k_52_P449<br>14  | Cyp4a1<br>2a     | Cytochrome P450,<br>family 4, subfamily a,<br>polypeptide 12a               | -2.327 | -1.619 | -1.530 |

|                                                                                                 |                        |                                                                    |        |        |        |
|-------------------------------------------------------------------------------------------------|------------------------|--------------------------------------------------------------------|--------|--------|--------|
| GT_Mm_44k_52_P595<br>871                                                                        | Cyp1a2                 | Cytochrome P450,<br>family 1, subfamily a,<br>polypeptide 2        | -1.452 | -1.410 | -2.324 |
| GT_Mm_44k_52_P681<br>787                                                                        | Cyb561                 | Cytochrome b-561                                                   | -1.004 | -0.584 | -0.425 |
| GT_Mm_44k_03237                                                                                 | Gm1029<br>1            | Glyceraldehyde-3-<br>phosphate dehydrogenase<br>pseudogene         | -1.704 | -0.429 | -1.079 |
| GT_Mm_44k_51_P182<br>828                                                                        | Pgk1                   | Phosphoglycerate kinase<br>1                                       | -0.608 | -0.164 | -1.312 |
| GT_Mm_44k_51_P189<br>442                                                                        | Adh4 ;<br>Adh6-<br>ps1 | Alcohol dehydrogenase 4<br>(class II), pi polypeptide              | -0.809 | -0.851 | -1.289 |
| GT_Mm_44k_51_P310<br>896                                                                        | Pfkl                   | Phosphofructokinase,<br>liver, B-type                              | -0.227 | -0.625 | -0.264 |
| GT_Mm_44k_51_P312<br>755                                                                        | Ins1                   | Insulin I                                                          | 0.506  | 1.039  | 1.206  |
| GT_Mm_44k_51_P327<br>295                                                                        | Akr1a4                 | Aldo-keto reductase<br>family 1, member A4<br>(aldehyde reductase) | -0.464 | -0.413 | -1.096 |
| GT_Mm_44k_51_P364<br>146                                                                        | Ldha                   | Lactate dehydrogenase A                                            | -1.382 | -0.866 | -2.390 |
| GT_Mm_44k_51_P404<br>275                                                                        | Adh5                   | Alcohol dehydrogenase 5<br>(class III), chi<br>polypeptide         | -0.824 | -0.275 | -1.203 |
| GT_Mm_44k_51_P426<br>886                                                                        | Gpi1                   | Glucose phosphate<br>isomerase 1                                   | 0.224  | -0.356 | 0.641  |
| GT_Mm_44k_51_P428<br>555                                                                        | Adh1                   | Alcohol dehydrogenase 1<br>(class I)                               | 0.286  | -0.407 | -0.650 |
| GT_Mm_44k_51_P462<br>385                                                                        | G6pc                   | Glucose-6-phosphatase,<br>catalytic                                | 0.765  | -0.992 | 1.384  |
| GT_Mm_44k_51_P510<br>418                                                                        | Aldh1b1                | Aldehyde dehydrogenase<br>1 family, member B1                      | -1.791 | -0.650 | -1.758 |
| GT_Mm_44k_52_P259<br>537                                                                        | Gck                    | Glucokinase                                                        | -1.039 | -0.754 | -1.248 |
| GT_Mm_44k_52_P407<br>060                                                                        | Ins2                   | Insulin II                                                         | 0.472  | 2.214  | 1.194  |
| GT_Mm_44k_52_P568<br>792                                                                        | Pdhb                   | Pyruvate dehydrogenase<br>(lipoamide) beta                         | -0.656 | -0.537 | -1.403 |
| GT_Mm_44k_52_P748<br>882                                                                        | Eno2                   | Enolase 2, gamma<br>neuronal                                       | 0.406  | -0.115 | 1.162  |
| GT_Mm_44k_52_P983<br>87                                                                         | Aldoa                  | Aldolase A, fructose-<br>bisphosphate                              | -0.125 | -0.361 | -0.086 |
| <b>Expression of fatty acid, cholesterol, steroid and triglyceride metabolism related genes</b> |                        |                                                                    |        |        |        |
| GT_Mm_44k_07860                                                                                 | Cyp4a2<br>9            | Cytochrome P450,<br>family 4, subfamily a,                         | 0.453  | 0.818  | 1.476  |

|                          |         |                                                                                         |        |        |        |
|--------------------------|---------|-----------------------------------------------------------------------------------------|--------|--------|--------|
| GT_Mm_44k_51_P289<br>742 | Slc27a5 | polypeptide 29<br>Solute carrier family 27<br>(fatty acid transporter),<br>member 5     | -0.416 | -0.486 | -1.203 |
| GT_Mm_44k_51_P324<br>633 | Elovl3  | Elongation of very long<br>chain fatty acids<br>(FEN1/Elo2, SUR4/Elo3,<br>yeast)-like 3 | -2.667 | -2.918 | -3.309 |
| GT_Mm_44k_01454          | Mut     | Methylmalonyl-<br>Coenzyme A mutase                                                     | 0.893  | 0.136  | -0.422 |
| GT_Mm_44k_51_P153<br>170 | Cyb5r3  | Cytochrome b5 reductase<br>3                                                            | -0.979 | -0.431 | -1.647 |
| GT_Mm_44k_51_P243<br>755 | Slc10a2 | Solute carrier family 10,<br>member 2                                                   | -1.673 | -1.427 | 0.248  |
| GT_Mm_44k_51_P245<br>123 | Baat    | Bile acid-Coenzyme A:<br>amino acid N-<br>acyltransferase                               | 0.291  | 0.072  | 0.395  |
| GT_Mm_44k_51_P255<br>817 | Scarb1  | Scavenger receptor class<br>B, member 1                                                 | -1.164 | -0.885 | -1.369 |
| GT_Mm_44k_51_P278<br>334 | Vldlr   | Very low density<br>lipoprotein receptor                                                | 1.328  | 1.674  | 0.759  |
| GT_Mm_44k_51_P329<br>711 | Idi1    | Isopentenyl-diphosphate<br>delta isomerase                                              | 0.212  | 0.433  | -1.050 |
| GT_Mm_44k_51_P336<br>060 | Lcat    | Lecithin cholesterol<br>acyltransferase                                                 | -1.235 | -0.713 | -0.986 |
| GT_Mm_44k_51_P355<br>943 | Mvd     | Mevalonate (diphospho)<br>decarboxylase                                                 | -0.529 | -0.660 | -0.829 |
| GT_Mm_44k_51_P380<br>881 | Med15   | Mediator complex<br>subunit 15                                                          | -1.354 | -0.346 | -0.610 |
| GT_Mm_44k_51_P385<br>598 | Slc37a4 | Solute carrier family 37<br>(glucose-6-phosphate<br>transporter), member 4              | 1.101  | -0.270 | 0.699  |
| GT_Mm_44k_51_P461<br>429 | Cyp7b1  | Cytochrome P450,<br>family 7, subfamily b,<br>polypeptide 1                             | -1.130 | -0.410 | 0.225  |
| GT_Mm_44k_51_P514<br>449 | Nr5a2   | Nuclear receptor<br>subfamily 5, group A,<br>member 2                                   | 0.533  | 0.526  | 0.861  |
| GT_Mm_44k_52_P150<br>236 | Apom    | Apolipoprotein M                                                                        | -0.369 | -0.383 | -0.151 |
| GT_Mm_44k_52_P244<br>193 | Cd24a   | CD24a antigen                                                                           | -0.633 | -0.727 | -0.219 |
| GT_Mm_44k_52_P251<br>403 | Tgfbr2  | Transforming growth<br>factor, beta receptor II                                         | 0.513  | 1.025  | 1.321  |
| GT_Mm_44k_52_P485<br>971 | Scap    | SREBF chaperone                                                                         | 0.379  | -0.325 | -0.503 |



|                          |                     |                                                                              |        |        |        |
|--------------------------|---------------------|------------------------------------------------------------------------------|--------|--------|--------|
| GT_Mm_44k_52_P488<br>427 | Sec14l2             | SEC14-like 2 ( <i>S. cerevisiae</i> )                                        | -1.203 | -0.656 | -1.260 |
| GT_Mm_44k_52_P636<br>752 | Cyp51               | Cytochrome P450, family 51                                                   | -1.426 | 0.852  | -0.863 |
| GT_Mm_44k_00911          | Cyp2d1<br>0;11 ; 22 | Cytochrome P450, family 2, subfamily d, polypeptide 22                       | -0.660 | -1.147 | -1.279 |
| GT_Mm_44k_01406          | Cyp4a1<br>4         | Cytochrome P450, family 4, subfamily a, polypeptide 14                       | 4.307  | 2.209  | 4.419  |
| GT_Mm_44k_01692          | Aste1               | Asteroid homolog 1 ( <i>Drosophila</i> )                                     | 0.926  | 0.055  | 0.450  |
| GT_Mm_44k_51_P120<br>295 | Cyp2d2<br>6         | Cytochrome P450, family 2, subfamily d, polypeptide 26                       | 0.234  | -0.419 | 0.446  |
| GT_Mm_44k_51_P122<br>170 | Rdh7                | Retinol dehydrogenase 7                                                      | -0.552 | -0.638 | -0.828 |
| GT_Mm_44k_51_P134<br>142 | Cyp2c7<br>0         | Cytochrome P450, family 2, subfamily c, polypeptide 70                       | -0.542 | -1.009 | -0.435 |
| GT_Mm_44k_51_P140<br>803 | Slco1b2             | Solute carrier organic anion transporter family, member 1b2                  | -0.432 | -0.315 | -0.645 |
| GT_Mm_44k_51_P144<br>581 | Pgrmc1              | Progesterone receptor membrane component 1                                   | -0.256 | -0.116 | -1.672 |
| GT_Mm_44k_51_P153<br>170 | Cyb5r3              | Cytochrome b5 reductase 3                                                    | -0.979 | -0.431 | -1.647 |
| GT_Mm_44k_51_P213<br>476 | Pgr                 | Progesterone receptor                                                        | 0.718  | 1.313  | 1.515  |
| GT_Mm_44k_51_P278<br>550 | Tecr                | Trans-2,3-enoyl-CoA reductase                                                | -0.455 | -0.666 | -1.096 |
| GT_Mm_44k_51_P418<br>056 | Sc5d                | Sterol-C5-desaturase homolog ( <i>S. cerevisiae</i> )                        | 0.233  | 0.174  | -0.998 |
| GT_Mm_44k_51_P421<br>418 | Hsd3b1              | Hydroxy-delta-5-steroid dehydrogenase, 3 beta- and steroid delta-isomerase 1 | -1.951 | -1.899 | -1.176 |
| GT_Mm_44k_51_P430<br>973 | Paqr7               | Progesterin and adipoQ receptor family member VII                            | -0.698 | -0.627 | -1.802 |
| GT_Mm_44k_51_P435<br>911 | Hsd3b7              | Hydroxy-delta-5-steroid dehydrogenase, 3 beta- and steroid delta-isomerase 7 | -0.771 | -0.791 | -1.315 |
| GT_Mm_44k_51_P445<br>662 | Hsd17b<br>4         | Hydroxysteroid (17-beta) dehydrogenase 4                                     | -0.351 | -0.175 | -1.011 |

|                          |                    |                                                                                        |        |        |        |
|--------------------------|--------------------|----------------------------------------------------------------------------------------|--------|--------|--------|
| GT_Mm_44k_51_P478<br>303 | Cyp2d9;<br>d12     | Cytochrome P450,<br>family 2, subfamily d,<br>polypeptide 9                            | -0.606 | -0.947 | -0.807 |
| GT_Mm_44k_51_P482<br>051 | Cyp3a4<br>1b ; a16 | Cytochrome P450,<br>family 3, subfamily a,<br>polypeptide 16                           | -0.488 | -0.452 | -0.942 |
| GT_Mm_44k_51_P489<br>367 | Cyp3a2<br>5        | Cytochrome P450,<br>family 3, subfamily a,<br>polypeptide 25                           | -0.986 | -1.262 | -2.248 |
| GT_Mm_44k_51_P493<br>649 | Sult1e1            | Sulfotransferase family<br>1E, member 1                                                | -1.252 | 0.405  | 2.340  |
| GT_Mm_44k_51_P496<br>162 | Hsd3b5             | Hydroxy-delta-5-steroid<br>dehydrogenase, 3 beta-<br>and steroid delta-<br>isomerase 5 | -2.942 | -2.279 | -1.754 |
| GT_Mm_44k_51_P510<br>418 | Aldh1b1            | Aldehyde dehydrogenase<br>1 family, member B1                                          | -1.791 | -0.650 | -1.758 |
| GT_Mm_44k_51_P521<br>128 | Ncoa6              | Nuclear receptor<br>coactivator 6                                                      | 0.306  | 0.136  | -0.538 |
| GT_Mm_44k_52_P132<br>165 | Hsd17b<br>11       | Hydroxysteroid (17-beta)<br>dehydrogenase 11                                           | -0.682 | -0.503 | -1.760 |
| GT_Mm_44k_52_P189<br>567 | Rnf4               | Ring finger protein 4                                                                  | 0.617  | -0.122 | 0.416  |
| GT_Mm_44k_52_P283<br>258 | Carm1              | Coactivator-associated<br>arginine<br>methyltransferase 1                              | 1.098  | 0.285  | 1.552  |
| GT_Mm_44k_52_P449<br>14  | Cyp4a1<br>2a       | Cytochrome P450,<br>family 4, subfamily a,<br>polypeptide 12a                          | -2.327 | -1.619 | -1.530 |
| GT_Mm_44k_52_P485<br>971 | Scap               | SREBF chaperone                                                                        | 0.379  | -0.325 | -0.503 |
| GT_Mm_44k_52_P519<br>689 | Rxrb               | Retinoid X receptor beta                                                               | -0.511 | -0.710 | -1.144 |
| GT_Mm_44k_52_P532<br>559 | Thrb               | Thyroid hormone<br>receptor beta                                                       | -4.380 | -0.746 | -1.770 |
| GT_Mm_44k_52_P595<br>871 | Cyp1a2             | Cytochrome P450,<br>family 1, subfamily a,<br>polypeptide 2                            | -1.452 | -1.410 | -2.324 |
| GT_Mm_44k_52_P636<br>752 | Cyp51              | Cytochrome P450,<br>family 51                                                          | -1.426 | 0.852  | -0.863 |
| GT_Mm_44k_01339          | Mttp               | Microsomal triglyceride<br>transfer protein                                            | 0.077  | 0.155  | 0.066  |
| GT_Mm_44k_51_P197<br>213 | Pnpla2             | Patatin-like<br>phospholipase domain<br>containing 2                                   | 0.627  | 0.404  | 0.959  |
| GT_Mm_44k_51_P259        | Lpl                | Lipoprotein lipase                                                                     | -0.938 | -0.588 | -1.496 |

|                          |        |                                                           |        |        |        |  |
|--------------------------|--------|-----------------------------------------------------------|--------|--------|--------|--|
| 296                      |        |                                                           |        |        |        |  |
| GT_Mm_44k_51_P290<br>207 | Insig1 | Insulin induced gene 1                                    | -0.384 | -0.237 | -1.236 |  |
| GT_Mm_44k_52_P113<br>250 | Insig2 | Insulin induced gene 2                                    | -0.227 | -0.437 | 1.075  |  |
| GT_Mm_44k_52_P447<br>929 | Tnxb   | Tenascin XB                                               | 0.489  | 0.911  | 1.206  |  |
| GT_Mm_44k_52_P572<br>808 | Agpat9 | 1-acylglycerol-3-<br>phosphate O-<br>acyltransferase 9    | 0.156  | 0.506  | 0.987  |  |
| GT_Mm_44k_52_P641<br>185 | Ptpn11 | Protein tyrosine<br>phosphatase, non-<br>receptor type 11 | -0.454 | 0.124  | -0.515 |  |
